# Supplementary material
Source: ML conference proceedings conference paper supplement (https://openaccess.thecvf.com/content/CVPR2022/html/Lyu_Portrait_Eyeglasses_and_CVPR_2022_paper.html)
Supplement: Supplementary file 3 [file Lyu_Portrait_Eyeglasses_and_CVPR_2022_supplemental.zip]

Archive with 4 entries (4 files):
- 03597-supp.mp4
- __MACOSX/._03597-supp.mp4
- 03597-supp.pdf
- __MACOSX/._03597-supp.pdf
